# Supplementary material for: Host-Directed FDA-Approved Drugs with Antiviral Activity against SARS-CoV-2 Identified by Hierarchical In Silico/In Vitro Screening Methods
Source: MDPI journal article supplement (doi:10.3390/ph14040332), 2021-04-06
Supplement: s1 [file s1]

## Supporting Information

### Host-directed FDA-approved drugs with antiviral activity against SARS-CoV-2 identified by hierarchical *in silico/in vitro* screening methods

Tiziana Ginex,<sup>1, §</sup> Urtzi Garaigorta,<sup>2, §</sup> David Ramírez,<sup>3</sup> Victoria Castro,<sup>2</sup> Vanesa Nozal,<sup>1</sup>  
Ines Maestro,<sup>1</sup> Javier García-Cárceles,<sup>1</sup> Nuria E. Campillo,<sup>1</sup> Ana Martinez,<sup>1</sup>  
Pablo Gastaminza,<sup>2,\*</sup> Carmen Gil<sup>1,\*</sup>

<sup>1</sup>Centro de Investigaciones Biológicas Margarita Salas-CSIC, Ramiro de Maeztu 9, 28040 Madrid (Spain)

<sup>2</sup>Centro Nacional de Biotecnología-CSIC, Calle Darwin 3, 28049 Madrid (Spain)

<sup>3</sup>Instituto de Ciencias Biomédicas, Universidad Autónoma de Chile, Llano Subercaseaux 2801 – piso 6, Santiago, Chile.

<sup>§</sup>Both authors contribute equally to this work

#### Index

**Page S2:** Table S1 Structural details about the eight targets analyzed in this study.

**Page S3:** Table S2 Clustering analysis of MD trajectories for S1-RBD and TMPRSS2.

**Page S4:** Top ranked drugs from the FDA Library by Virtual screening: MMGBSA values and controls used for each target studied.

**Page S14:** Figure S1 RMSD and RMSF analyses for the protein backbone atoms of S1-RBD and TMPRSS2.

**Page S15:** Figure S2 Evaluation of the antiviral candidates using immunofluorescence microscopy-based viral antigen detection,

**Page S16:** Figure S3 Evaluation of compound cytotoxicity.

**Table S1.** Structural details about the eight targets analyzed in this study.

| Targets            | Available PDB structures <sup>a</sup> | Selected PDB structure                        | Number of conformations used for VS              | Binding sites                                                                                                               | Control inhibitors                                                               |
|--------------------|---------------------------------------|-----------------------------------------------|--------------------------------------------------|-----------------------------------------------------------------------------------------------------------------------------|----------------------------------------------------------------------------------|
| <b>Virus-host</b>  |                                       |                                               |                                                  |                                                                                                                             |                                                                                  |
| <b>S1-RBD</b>      | 301                                   | 6M0J                                          | 6<br>- 1 Minimized<br>- 5 Clusters (0-4) from MD | <b>Active site:</b><br>F154, Y157, N155, K85, N161, Y117, Y121, Q166, T168, N169, Y173, Y173                                | -                                                                                |
| <b>Host</b>        |                                       |                                               |                                                  |                                                                                                                             |                                                                                  |
| <b>TMPRSS2</b>     | -                                     | Homology modeling from 5CE1 (TMPRSS)          | 4<br>- 1 Minimized<br>- 3 Clusters (0-2) from MD | <b>Active site:</b><br>S296, T314, D290, S291, V135, W163, C136 C152                                                        | camostat<br>nafamostat<br>bromhexine                                             |
| <b>AAK-1</b>       | 3                                     | 4WSQ                                          | 1<br>- Minimized                                 | <b>Active site:</b><br>G55, K74, M126, D127, F128, Q133, L183, D194                                                         | sunitinib<br>baricitinib<br>5L4Q-ligand ( <b>LKB</b> )                           |
|                    |                                       |                                               | 1<br>- Minimized                                 | <b>Allosteric site:</b><br>H82, R89, R175, D176, S197, A198, T199, N200, Q203, E208, A212, E216                             | gefitinib                                                                        |
| <b>Cathepsin-L</b> | 38                                    | 4AXL                                          | 1<br>- Minimized                                 | <b>Active site:</b><br>C25, H163, N187                                                                                      | oxocarbazate                                                                     |
| <b>Furin</b>       | 21                                    | 5MIM                                          | 1<br>- Minimized                                 | <b>Active site:</b><br>H194, N295, S368.                                                                                    | 5MIM-ligand ( <b>1n</b> )                                                        |
| <b>GAK</b>         | 7                                     | 5Y7Z (Active Site)                            | 1<br>- Minimized                                 | <b>Active site:</b><br>K69, E124, C126, Q129, D191                                                                          | Wee1/Chk1<br>gefitinib<br>bosutinib                                              |
|                    |                                       | 5Y80 (Allosteric site)                        | 1<br>- Minimized                                 | <b>Allosteric site:</b><br>D173, H200, T223, S194, N221                                                                     | gefitinib                                                                        |
| <b>PIKfyve</b>     | -                                     | Homology Modeling from 6CMW (zebrafish PIP5K) | 1<br>- Minimized                                 | <b>Active site:</b><br>G19, K20, S21, A23, F25, I34, K36, 96, E97, N98, L99, F100, D110, K112, V132, L179, I194, D195, R198 | apilimod<br>YM201636                                                             |
| <b>TPC2</b>        | 3                                     | 6NQ0 (Open)<br>6NQ2 (Closed)                  | 2<br>- Minimized open<br>- Minimized closed      | <b>Main site:</b><br>N305, A691                                                                                             | raloxifen<br>tamoxifen<br>pimozide<br>tetrandrine<br>fluphenazine<br>verapamil-S |
|                    |                                       |                                               | 2<br>- Minimized open<br>- Minimized closed      | <b>Secondary site:</b><br>W157, R210, F193                                                                                  | ned19                                                                            |

<sup>a</sup>Last accession: October 20, 2020. Only structures for *Homo sapiens* for host-based targets were considered.

**Table S2.** Clustering analysis of MD trajectories for S1-RBD and TMPRSS2.

| # Clusters* | S1-RBD     |          | TMPRSS2    |         |
|-------------|------------|----------|------------|---------|
|             | Population | Frac     | Population | Frac    |
| 0           | 1721       | 43.0%    | 625        | 16.1%   |
| 1           | 739        | 18.5%    | 606        | 15.6%   |
| 2           | 595        | 14.9%    | 561        | 14.4%   |
| 3           | 452        | 11.3%    | 406        | 10.4%** |
| 4           | 354        | 8.8%     | 395        | 10.2%** |
| 5           | 62         | 1.5%***  | 367        | 9.4%**  |
| 6           | 48         | 1.2%***  | 333        | 8.6%**  |
| 7           | 26         | 0.6%***  | 329        | 8.5%**  |
| 8           | 2          | 0.1%***  | 149        | 3.8%**  |
| 9           | 1          | <0.1%*** | 115        | 3.0%**  |

\* A total of 10 clusters were preliminary searched. Cut-off for determining local density was 4 angstroms. Average linkage algorithm, which uses the average distance between members of two clusters, was applied.

\*\* Discarded because the catalytic site is closed.

\*\*\* Discarded since population is less than 5%.

**Table S3.** Top ranked drugs from the FDA Library by Virtual screening: MMGBSA values and controls used for each target studied.

### ACE2-S

| No | Drug name          | MMGBSA<br>(Kcal.mol <sup>-1</sup> ) |                                      |
|----|--------------------|-------------------------------------|--------------------------------------|
| 1  | PENTAGASTRIN       | -75.578                             |                                      |
| 2  | RITONAVIR          | -72.177                             |                                      |
| 3  | NONOXYNOL-9        | -70.87                              | Not selected. Cosmetic ingredient    |
| 4  | BENZONATATE        | -68.252                             |                                      |
| 5  | LINACLOTIDE        | -68.036                             |                                      |
| 6  | NADIDE             | -67.116                             |                                      |
| 7  | TILMICOSIN         | -65.933                             | Not selected. Veterinary drug        |
| 8  | THIOSTREPTON       | -64.685                             |                                      |
| 9  | DIRITHROMYCIN      | -61.916                             |                                      |
| 10 | CANDICIDIN         | -60.409                             | Not selected. Vaginal administration |
| 11 | LANATOSIDE C       | -60.163                             |                                      |
| 12 | ETOPOSIDE          | -58.7                               |                                      |
| 13 | AMPHOTERICIN B     | -58.473                             |                                      |
| 14 | beta-CAROTENE      | -58.21                              |                                      |
| 15 | IOXILAN            | -58.045                             | Not selected. Contrast agent         |
| 16 | ESCIN              | -57.95                              |                                      |
| 17 | DACTINOMYCIN       | -57.789                             |                                      |
| 18 | CANAGLIFLOZIN      | -57.618                             |                                      |
| 19 | PANTETHINE         | -57.003                             |                                      |
| 20 | DIGITOXIN          | -56.284                             |                                      |
| 21 | CEFOPERAZONE       | -56.216                             |                                      |
| 22 | ACARBOSE           | -56.138                             |                                      |
| 23 | SILIBININE         | -56.054                             |                                      |
| 24 | IVERMECTIN         | -55.217                             |                                      |
| 25 | TOLTRAZURIL        | -55.053                             | Not selected. Veterinary drug        |
| 26 | SENNOSIDE A        | -54.841                             | Not selected. Strong laxative        |
| 27 | SUVOREXANT         | -54.778                             |                                      |
| 28 | PENFLURIDOL        | -54.723                             |                                      |
| 29 | CEFDITORIN PIVOXIL | -54.694                             |                                      |
| 30 | SPIRAMYCIN         | -53.601                             |                                      |
| 31 | PROSCILLARIDIN A   | -53.579                             |                                      |
| 32 | ADEFOVIR DIPIVOXYL | -53.423                             |                                      |
| 33 | TERFENADINE        | -53.219                             |                                      |
| 34 | TELITHROMYCIN      | -53.218                             |                                      |
| 35 | CEFPIRAMIDE        | -53.212                             |                                      |
| 36 | TENIPOSIDE         | -53.095                             |                                      |
| 37 | NYSTATIN           | -53                                 |                                      |
| 38 | MUPIROCIN          | -52.942                             |                                      |
| 39 | LACTULOSE          | -52.927                             |                                      |
| 40 | RIFAXIMIN          | -52.887                             |                                      |
| 41 | INDINAVIR SULFATE  | -52.783                             |                                      |
| 42 | BISOCTRIZOLE       | -52.684                             |                                      |
| 43 | CEPHALONIUM        | -52.662                             |                                      |
| 44 | KITASAMYCINS       | -52.638                             |                                      |
| 45 | RUTIN              | -52.577                             |                                      |
| 46 | DIOSMIN            | -52.142                             |                                      |
| 47 | RACECADOTRIL       | -51.857                             |                                      |
| 48 | TROXERUTIN         | -51.8                               |                                      |
| 49 | DROPERIDOL         | -51.743                             |                                      |
| 50 | LOPINAVIR          | -50.994                             |                                      |

No reference compounds were used. These are the 50 top ranked compounds

## TMPRSS2

| No                  | Drug name                      | MMGBSA<br>(Kcal.mol <sup>-1</sup> ) |                                   |
|---------------------|--------------------------------|-------------------------------------|-----------------------------------|
| 1                   | NONOXYNOL-9                    | -78.098                             | Not selected. Cosmetic ingredient |
| 2                   | TILMICOSIN                     | -62.126                             |                                   |
| 3                   | INDINAVIR SULFATE              | -60.346                             |                                   |
| 4                   | LAPATINIB                      | -59.217                             |                                   |
| 5                   | SENNOSIDE A                    | -57.548                             | Not selected. Strong laxative     |
| 6                   | TELITHROMYCIN                  | -57.161                             |                                   |
| 7                   | DOXORUBICIN                    | -57.021                             |                                   |
| 8                   | PACLITAXEL                     | -57.008                             |                                   |
| 9                   | CANAGLIFLOZIN                  | 56.252                              |                                   |
| 10                  | NADIDE                         | -55.618                             |                                   |
| 11                  | PANTETHINE                     | 55.469                              |                                   |
| 12                  | CHLORAMPHENICOL<br>PALMITATE   | -55.232                             |                                   |
| 13                  | ALON                           | -55.017                             |                                   |
| 14                  | DIOSMIN                        | -54.968                             |                                   |
| 15                  | CASANTHRANOL                   | -54.683                             | Not selected. Strong laxative     |
| 16                  | DIPYRIDAMOLE                   | -54.325                             |                                   |
| 17                  | AMPHOTERICIN B                 | -53.671                             |                                   |
| 18                  | CEFPODOXIME PROXETIL           | -52.074                             |                                   |
| 19                  | RIFAXIMIN                      | -52.035                             |                                   |
| 20                  | TELMISARTAN                    | -51.88                              |                                   |
| 21                  | ACARBOSE                       | -51.721                             |                                   |
| 22                  | RITONAVIR                      | -51.71                              |                                   |
| 23                  | PREDNISOLONE ACETATE           | -51.709                             |                                   |
| 24                  | MUPIROCIN                      | -51.669                             |                                   |
| 25                  | ERYTHROMYCIN<br>ETHYLSUCCINATE | -50.953                             |                                   |
| 26                  | SUCRALOSE                      | -50.881                             |                                   |
| 27                  | TOBRAMYCIN                     | -50.208                             |                                   |
| 28                  | EMPAGLIFLOZIN                  | -50.196                             |                                   |
| 29                  | SILIBININ                      | -50.022                             |                                   |
| 30                  | DI-O-DEMETHYLCURCUMIN          | -49.817                             |                                   |
| 31                  | DIGOXIN                        | -49.647                             |                                   |
| 32                  | CAPECITABINE                   | -49.287                             |                                   |
| 33                  | DORAMECTIN                     |                                     |                                   |
| 34                  | FOLIC ACID                     | -49.108                             |                                   |
| 35                  | PENTAGASTRIN                   | -49.002                             |                                   |
| 36                  | METERGOLINE                    | -48.979                             |                                   |
| 37                  | PYRITINOL                      | -48.761                             |                                   |
| 38                  | DIGITOXIN                      | -48.602                             |                                   |
| 39                  | DIBEKACIN                      | -48.31                              |                                   |
| 40                  | GLAFENINE                      | -48.163                             |                                   |
| 41                  | CIANIDANOL                     | -48.154                             |                                   |
| 42                  | KITASAMYCINS                   | -47.972                             |                                   |
| 43                  | IOVERSOL                       | -47.408                             | Not selected. Contrast agent      |
| 44                  | PROTIRELIN                     | -47.204                             |                                   |
| 45                  | TERFENADINE                    | -47.081                             |                                   |
| 46                  | ZOLPIDEM                       | -46.875                             |                                   |
| 47                  | CEFPIRAMIDE                    | -46.861                             |                                   |
| 48                  | COLCHICINE                     | -46.397                             |                                   |
| 49                  | CHLORALOSE                     | -46.037                             | Not selected. Raticide            |
| Reference compounds |                                |                                     |                                   |
|                     | CAMOSTAT                       | -46.151                             |                                   |
|                     | NAFAMOSTAT                     | -44.812                             |                                   |

|  |            |         |
|--|------------|---------|
|  | BROMHEXINE | -31.454 |
|--|------------|---------|

## Furin

| No | Drug name              | MMGBSA<br>(Kcal.mol <sup>-1</sup> ) |                                      |
|----|------------------------|-------------------------------------|--------------------------------------|
| 1  | DIBEKACIN              | -71.612                             |                                      |
| 2  | ACARBOSE               | -58.223                             |                                      |
| 3  | KETOCONAZOLE           | -57.905                             |                                      |
| 4  | PROTIRELIN             | -56.713                             |                                      |
| 5  | CLOFAZIMINE            | -53.168                             |                                      |
| 6  | AZITHROMYCIN           | -52.296                             |                                      |
| 7  | TELITHROMYCIN          | -52.04                              |                                      |
| 8  | TOBRAMYCIN             | -51.705                             |                                      |
| 9  | DOXORUBICIN            | -51.231                             |                                      |
| 10 | OLMESARTAN MEDOXOMIL   | -51.167                             |                                      |
| 11 | TERCONAZOLE            | -49.62                              | Not selected. Vaginal administration |
| 12 | TILMICOSIN             | -49.094                             |                                      |
| 13 | TIOCONAZOLE            | -48.643                             | Not selected. Topical use            |
| 14 | CANDICIDIN             | -48.522                             | Not selected. Vaginal administration |
| 15 | AZACITIDINE            | -48.399                             |                                      |
| 16 | TILORONE               | -48.098                             |                                      |
| 17 | RESERPINE              | -47.906                             |                                      |
| 18 | KETANSERIN             | -47.802                             |                                      |
| 19 | LEVOFLOXACIN           | -46.515                             |                                      |
| 20 | ATENOLOL               | -45.586                             |                                      |
| 21 | FAMOTIDINE             | -45.569                             |                                      |
| 22 | RUTIN                  | -45.447                             |                                      |
| 23 | OLANZAPINE             | -45.362                             |                                      |
| 24 | DIOSMIN                | -45.245                             |                                      |
| 25 | HYCANTHONE             | -45.143                             |                                      |
| 26 | AMSACRINE              | -44.555                             |                                      |
| 27 | CEPHARANTHINE          | -44.369                             |                                      |
| 28 | PERPHENAZINE           | -43.941                             |                                      |
| 29 | PANTOPRAZOLE           | -43.448                             |                                      |
| 30 | OMEPRazole             | -43.283                             |                                      |
| 31 | PROTOPORPHYRIN IX      | -42.845                             |                                      |
| 32 | RIFAXIMIN              | -42.751                             |                                      |
| 33 | DIGITOXIN              | -42.52                              |                                      |
| 34 | CEFDITORIN PIVOXIL     | -42.11                              |                                      |
| 35 | BIFONAZOLE             | -41.284                             |                                      |
| 36 | LINAGLIPTIN            | -40.729                             |                                      |
| 37 | NAFTOPIDIL             | -40.708                             |                                      |
| 38 | ZOLPIDEM               | -40.707                             |                                      |
| 39 | GLAFENINE              | -40.643                             |                                      |
| 40 | ITOPRIDE HYDROCHLORIDE | -40.488                             |                                      |
| 41 | METAPROTERENOL         | -40.247                             |                                      |
| 42 | SIROLIMUS              | -40.18                              |                                      |
| 43 | TRIMETHOPRIM           | -39.921                             |                                      |
| 44 | LUMEFANTRINE           | -39.636                             |                                      |
| 45 | BRIMONIDINE            | -39.552                             | Not selected. Oftalmic drops         |
| 46 | DIAPERIDINE            | -39.453                             | Not selected. Veterinary drug        |
| 47 | PALIPERIDONE           | -39.377                             |                                      |
| 48 | SPIRAMYCIN             | -39.299                             |                                      |
| 49 | PIRENPERONE            | -39.233                             |                                      |
| 50 | CEFPODOXIME PROXETIL   | -39.174                             |                                      |
| 51 | CASANTHRANOL           | -39.037                             | Not selected. Strong laxative        |
| 52 | CEFUROXIME AXETIL      | -38.846                             |                                      |

|                            |                          |         |
|----------------------------|--------------------------|---------|
| 53                         | AMOXAPINE                | -38.785 |
| 54                         | BRINZOLAMIDE             | -38.742 |
| 55                         | MIGLITOL                 | -38.268 |
| 56                         | INDINAVIR SULFATE        | -38.133 |
| 57                         | DIGOXIN                  | -38.063 |
| 58                         | EPROBEMIDE               | -37.614 |
| 59                         | DAPAGLIFLOZIN            | -37.544 |
| 60                         | AJMALINE                 | -37.38  |
| 61                         | DIRITHROMYCIN            | -37.305 |
| 62                         | GEFITINIB                | -37.088 |
| 63                         | MANIDIPINE HYDROCHLORIDE | -37.078 |
| 64                         | THIAMPHENICOL            | -37.032 |
| <b>Reference compounds</b> |                          |         |
|                            | 5MIM_ligand1             | -71.53  |
|                            | CompoundDC1              | -37.908 |
|                            | CompoundB1               | -36.758 |

### Cathepsin L

| No | Drug name         | MMGBSA<br>(Kcal.mol <sup>-1</sup> ) |                               |
|----|-------------------|-------------------------------------|-------------------------------|
| 1  | DIRITHROMYCIN     | -72.14                              |                               |
| 2  | CLOFAZIMINE       | -65.981                             |                               |
| 3  | PACLITAXEL        | -62.962                             |                               |
| 4  | TELITHROMYCIN     | -61.943                             |                               |
| 5  | ELLAGIC ACID      | -61.746                             |                               |
| 6  | EMPAGLIFLOZIN     | -61.511                             |                               |
| 7  | GLAFENINE         | -58.667                             |                               |
| 8  | ORBIFLOXACIN      | -58.113                             | Not selected. Veterinary drug |
| 9  | KETOCONAZOLE      | -57.356                             |                               |
| 10 | RESERPINE         | -57.307                             |                               |
| 11 | ZOLPIDEM          | -56.429                             |                               |
| 12 | TOBRAMYCIN        | -55.297                             |                               |
| 13 | SPARFLOXACIN      | -55.228                             |                               |
| 14 | IMATINIB          | -54.975                             |                               |
| 15 | CLIMBAZOLE        | -54.814                             |                               |
| 16 | RUTIN             | -54.482                             |                               |
| 17 | NADOLOL           | -54.15                              |                               |
| 19 | NAFTOPIDIL        | -54.025                             |                               |
| 20 | ALOIN             | -53.31                              |                               |
| 21 | TELMISARTAN       | -52.716                             |                               |
| 22 | LAPATINIB         | -52.512                             |                               |
| 23 | OXETHAZAINE       | -52.477                             |                               |
| 24 | METERGOLINE       | -52.324                             |                               |
| 25 | RIBOFLAVIN        | -52.306                             |                               |
| 26 | ACARBOSE          | -52.196                             |                               |
| 27 | ADENOSINE         | -50.892                             |                               |
| 28 | DAPAGLIFLOZIN     | -50.457                             |                               |
| 29 | EZETIMIBE         | -50.372                             |                               |
| 30 | INDINAVIR SULFATE | -49.704                             |                               |
| 31 | CIANIDANOL        | -49.664                             |                               |
| 32 | BROMPERIDOL       | -49.214                             |                               |
| 33 | CEFALONIUM        | -49.123                             |                               |
| 34 | CEFPODOXIME       |                                     |                               |
|    | PROXETIL          | -48.015                             |                               |
| 35 | CARVEDILOL        | -47.542                             |                               |
| 36 | PANTOPRAZOLE      | -47.324                             |                               |
| 37 | CILOSTAZOL        | -47.044                             |                               |
| 38 | CASANTHRANOL      | -47.025                             | Not selected. Strong laxative |

|                            |                   |         |
|----------------------------|-------------------|---------|
| 39                         | CAPECITABINE      | -46.918 |
| 40                         | BRIVUDINE         | -46.918 |
| 41                         | HEXESTROL         | -46.484 |
| 42                         | LANATOSIDE C      | -46.443 |
| 43                         | OMEPRazole        | -46.063 |
| 44                         | CABAZITAXEL       | -46.043 |
| 45                         | TIGECYCLINE       | -45.701 |
| 46                         | CHLORAMPHENICOL   | -45.367 |
| 47                         | AZITHROMYCIN      | -45.002 |
| 48                         | SILIBININ         | -44.898 |
| 49                         | PENTAGASTRIN      | -44.417 |
| 50                         | PIRENPERONE       | -44.415 |
| 51                         | BERGENIN          | -44.243 |
| 52                         | PENFLURIDOL       | -44.146 |
| <b>Reference compounds</b> |                   |         |
|                            | Ligand_2YJC1      | -60.3   |
|                            | 3bc3_ligand       | -55.817 |
|                            | Propeptidimimetic | -55.248 |
|                            | Oxocarbazate      | -40.762 |
|                            | SID2661509        | -40.449 |
|                            | azapeptide        | -40.181 |

### AAK1

| No | Drug name              | MMGBSA<br>(Kcal.mol <sup>-1</sup> ) |                                   |
|----|------------------------|-------------------------------------|-----------------------------------|
| 1  | BENZONATATE            | -72.657                             |                                   |
| 2  | DIOSMIN                | -69.592                             |                                   |
| 3  | NONOXYNOL-9            | -66.803                             | Not selected. Cosmetic ingredient |
| 4  | PERPHENAZINE           | -66.461                             |                                   |
| 5  | PYRITINOL              | -66.029                             |                                   |
| 6  | EMPAGLIFLOZIN          | -61.804                             |                                   |
| 7  | EFLOXATE               | -61.579                             |                                   |
| 8  | GLAFENINE              | -60.817                             |                                   |
| 9  | NICLOSAMIDE            | -60.742                             |                                   |
| 10 | TROXERUTIN             | -60.405                             |                                   |
| 11 | LAPATINIB              | -59.137                             |                                   |
| 12 | DAPAGLIFLOZIN          | -58.52                              |                                   |
| 13 | ADEFOVIR DIPIVOXYL     | -58.329                             |                                   |
| 14 | DANTHRON               | -57.872                             | Not selected. Strong laxative     |
| 16 | DI-O-DEMETHYL-CURCUMIN | 57.714                              |                                   |
| 17 | HYCANTHONE             | -57.56                              |                                   |
| 18 | ELLAGIC ACID           | -56.911                             |                                   |
| 19 | DYPHYLLINE             | -53.646                             |                                   |
| 20 | ANTHRALIN              | -56.435                             |                                   |
| 21 | ACETAMINOSALOL         | -55.437                             |                                   |
| 22 | COUMOPHOS              | -55.095                             | Not selected. Insecticide         |
| 23 | TELITHROMYCIN          | -55.069                             |                                   |
| 24 | EBASTINE               | -54.99                              |                                   |
| 25 | OFLOXACIN              | -54.957                             |                                   |
| 26 | CEFUROXIME AXETIL      | -53.754                             |                                   |



|                     |                    |         |                               |
|---------------------|--------------------|---------|-------------------------------|
| 27                  | PHYTONADIONE [5mM] | -53.431 |                               |
| 28                  | ESTRADIOL BENZOATE | -53.41  |                               |
| 29                  | INDOPROFEN         | -52.359 |                               |
| 30                  | NOCODAZOLE         | -52.327 |                               |
| 31                  | CIANIDANOL         | -51.355 |                               |
| 32                  | PANTETHINE         | -51.281 |                               |
| 33                  | TEPOXALIN          | -51.119 | Not selected. Veterinary drug |
| 34                  | DOXORUBICIN        | -51.026 |                               |
| 35                  | GEFITINIB          | -50.316 |                               |
| 36                  | DICHLOROPHEN       | -50.107 | Not selected. Veterinary drug |
| 37                  | IDEBENONE          | -50.102 |                               |
| 38                  | alpha-TOCHOPHEROL  | -50.094 |                               |
| 39                  | NORFLOXACIN        | -49.778 |                               |
| 40                  | CANAGLIFLOZIN      | -49.778 |                               |
| 41                  | ENOXACIN           | -49.773 |                               |
| 42                  | CEFALONIUM         | -49.429 |                               |
| 43                  | BERGENIN           | -49.175 |                               |
| 44                  | NADOLOL            | -48.984 |                               |
| Reference compounds |                    |         |                               |
|                     | 4WSQ_ligand        | -67.88  |                               |
|                     | 5TEO_LIG           | -62.234 |                               |
|                     | Baricitinib        | -57.867 |                               |
|                     | 5L4Q_lig           | -57.135 |                               |
|                     | Gefitinib          | -34.972 |                               |

## PIKfyve

| No | Drug name                     | MMGBSA<br>(Kcal.mol <sup>-1</sup> ) |                                   |
|----|-------------------------------|-------------------------------------|-----------------------------------|
| 1  | RITONAVIR                     | -98.136                             |                                   |
| 2  | NONOXYNOL-9                   | -76.417                             | Not selected. Cosmetic ingredient |
| 3  | KITASAMYCINS                  | -74.968                             |                                   |
| 4  | CHLORAMPHENICOL<br>PALMITATE  | -68.991                             |                                   |
| 5  | OLMESARTAN<br>MEDOXOMIL       | -65.743                             |                                   |
| 6  | TEPOXALIN                     | -65.153                             | Not selected. Veterinary drug     |
| 7  | ACARBOSE                      | -64.351                             |                                   |
| 8  | LOPINAVIR                     | -64.272                             |                                   |
| 9  | CEFUROXIME AXETIL             | -61.211                             |                                   |
| 10 | PODOFILOX                     | -61.143                             | Not selected. Topic application   |
| 11 | TIOCONAZOLE                   | -61.122                             | Not selected. Topic application   |
| 12 | NAFTOPIDIL                    | -60.156                             |                                   |
| 13 | CASANTHRANOL                  | -58.984                             | Not selected. Strong laxative     |
| 14 | PREDNISOLONE<br>HEMISUCCINATE | -57.044                             |                                   |
| 15 | PENFLURIDOL                   | -56.614                             |                                   |
| 16 | AMCINONIDE                    | -55.285                             | Not selected. Topic application   |
| 17 | CLOTRIMAZOLE                  | -55.216                             |                                   |
| 18 | AVANAFIL                      | -55.175                             |                                   |
| 19 | CEFOPERAZONE                  | -55.096                             |                                   |

|                            |                                 |         |                                   |
|----------------------------|---------------------------------|---------|-----------------------------------|
| 20                         | GEFITINIB                       | -54.89  |                                   |
| 21                         | PHENOLPHTHALEIN                 | -54.823 | Not selected. pH indicator        |
| 22                         | MYCOPHENOLATE<br>MOFETIL        | -54.712 |                                   |
| 23                         | DI-O-DEMETHYL-<br>CURCUMIN      | -54.641 |                                   |
| 24                         | HYDROCORTISONE<br>HEMISUCCINATE | -54.228 |                                   |
| 25                         | ASCORBYL<br>PALMITATE           | -54.204 |                                   |
| 26                         | DERACOXIB                       | -54.1   | Not selected. Veterinary drug     |
| 27                         | DOXORUBICIN                     | -54.10  |                                   |
| 28                         | SERATRODAST                     | -53.996 |                                   |
| 29                         | CANAGLIFLOZIN                   | -53.949 |                                   |
| 30                         | OCTOCRYLENE                     | -53.915 | Not selected. Cosmetic sun filter |
| 31                         | OXETHAZAINE                     | -53.692 | Not selected. Potent anesthetic   |
| 32                         | NEFAZODONE<br>HYDROCHLORIDE     | -53.604 |                                   |
| 33                         | AZAPERONE                       | -53.598 | Not selected. Veterinary drug     |
| 34                         | ACEMETACIN                      | -53.534 |                                   |
| 35                         | DROPERIDOL                      | -53.212 |                                   |
| 36                         | TERFENADINE                     | -53.19  |                                   |
| 37                         | LORATADINE                      | -52.593 |                                   |
| 38                         | FENOFIBRIC ACID                 | -52.204 |                                   |
| 39                         | LAPATINIB                       | -52.154 |                                   |
| 40                         | CLIMBAZOLE                      | -52.135 | Not selected. Topic application   |
| 41                         | CABAZITAXEL                     | -52.118 |                                   |
| 42                         | INDINAVIR SULFATE               | -51.812 |                                   |
| 43                         | CAPSAICIN                       | -51.775 | Not selected. Topic application   |
| 44                         | GLAFENINE                       | -51.65  |                                   |
| 45                         | RIBOFLAVIN                      | -51.482 |                                   |
| 46                         | PROSCILLARIDIN A                | -51.288 |                                   |
| 47                         | CELECOXIB                       | -51.138 |                                   |
| 48                         | PIRIBEDIL<br>HYDROCHLORIDE      | -51.126 |                                   |
| 49                         | AVOBENZONE                      | -51.126 | Not selected. Cosmetic sun filter |
| 50                         | SULFASALAZINE                   | -51.009 |                                   |
| 51                         | RACECADOTRIL                    | -50.938 |                                   |
| 52                         | CARVEDILOL                      | -50.937 |                                   |
| 53                         | PHENOLSULFON-<br>PHTHALEIN      | -50.799 | Not selected. pH indicator        |
| 54                         | MEBENDAZOLE                     | -50.739 |                                   |
| <b>Reference compounds</b> |                                 |         |                                   |
|                            | Apilimod                        | -52,92  |                                   |
|                            | YM201636                        | -50,739 |                                   |

## TPC2

| No | Drug name            | MMGBSA<br>(Kcal.mol <sup>-1</sup> ) |                                   |
|----|----------------------|-------------------------------------|-----------------------------------|
| 1  | CASANTHRANOL         | -81.125                             | Not selected. Strong laxative     |
| 2  | TROXERUTIN           | -80.572                             |                                   |
| 3  | POSACONAZOLE         | -78.636                             |                                   |
| 4  | CANDICIDIN           | -75.041                             | Not selected. Topical use         |
| 5  | BEMOTRIZINOL         | -73.155                             | Not selected. Cosmetic sun screen |
| 6  | CEFPODOXIME PROXETIL | -70.488                             |                                   |
| 7  | CEFOPERAZONE         | -66.904                             |                                   |
| 8  | TELMISARTAN          | -65.780                             |                                   |

|                            |                            |         |                               |
|----------------------------|----------------------------|---------|-------------------------------|
| 9                          | CEPHARANTHINE              | -64.637 |                               |
| 10                         | TILMICOSIN                 | -63.858 |                               |
| 11                         | CEFDITORIN PIVOXIL         | -63.377 |                               |
| 12                         | ESTRIOL TRIPROPIONATE      | -63.146 |                               |
| 13                         | DIOSMIN                    | -62.722 |                               |
| 14                         | DIPYRIDAMOLE               | -62.654 |                               |
| 15                         | TELITHROMYCIN              | -62.397 |                               |
| 16                         | LOPINAVIR                  | -62.244 |                               |
| 17                         | GLYCYRRHIZIN               | -61.566 |                               |
| 18                         | TENIPOSIDE                 | -60.842 |                               |
| 19                         | CANDESARTAN CILEXTIL       | -60.793 |                               |
| 20                         | NADIDE                     | -60.028 |                               |
| 21                         | ACARBOSE                   | -60.001 |                               |
| 22                         | OLMESARTAN MEDOXOMIL       | -59.428 |                               |
| 23                         | BETAMETHASONE VALERATE     | -57.152 |                               |
| 24                         | RIFAPENTINE                | -56.670 |                               |
| 25                         | INDINAVIR SULFATE          | -56.655 |                               |
| 26                         | MUPIROCIN                  | -56.513 |                               |
| 27                         | CAPECITABINE               | -55.893 |                               |
| 28                         | ACEMETACIN                 | -55.859 |                               |
| 29                         | MYCOPHENOLATE MOFETIL      | -55.703 |                               |
| 30                         | PREDNISOLONE HEMISUCCINATE | -55.588 |                               |
| 31                         | VOGLIBOSE                  | -54.901 |                               |
| 32                         | RAMIPRIL                   | -54.599 |                               |
| 33                         | CANAGLIFLOZIN              | -54.081 |                               |
| 34                         | DESONIDE                   | -53.949 |                               |
| 35                         | LANATOSIDE C               | -53.290 |                               |
| 36                         | AMCINONIDE                 | -53.246 | Not selected. Topical use     |
| 37                         | PRULIFLOXACIN              | -53.173 |                               |
| 38                         | ETOPOSIDE                  | -52.985 |                               |
| 39                         | TRIAMCINOLONE ACETONIDE    | -52.889 |                               |
| 40                         | TIGECYCLINE                | -52.883 |                               |
| 41                         | OXIGLUTATIONE              | -52.572 |                               |
| 42                         | TEPOXALIN                  | -52.242 | Not selected. Veterinary drug |
| 43                         | CHENODIOL                  | -52.220 | Not selected. Hepatotoxic     |
| 44                         | URSODIOL                   | -52.220 | Not selected. Hepatotoxic     |
| 45                         | RESERPINE                  | -51.907 |                               |
| <b>Reference compounds</b> |                            |         |                               |
|                            | Raloxifene                 | -66.306 |                               |
|                            | Tamoxifen                  | -55.876 |                               |
|                            | Verapamil-S                | -53.397 |                               |
|                            | Clomiphene                 | -49.982 |                               |
|                            | Fluphenazin                | -48.135 |                               |
|                            | Tetrandine                 | -50.288 |                               |
|                            | Bisbenzylisoquinoline      | -47.631 |                               |
|                            | Pimozide                   | -47.467 |                               |
|                            | Ned-19                     | -43.640 |                               |

## GAK

| No | Drug name        | MMGBSA<br>(Kcal.mol <sup>-1</sup> ) |                                   |
|----|------------------|-------------------------------------|-----------------------------------|
| 1  | GLAFENINE        | -69.481                             |                                   |
| 2  | LAPATINIB        | -66.346                             |                                   |
| 3  | TILOPHONE        | -66.265                             |                                   |
| 4  | EFLOXATE         | -66.039                             |                                   |
| 5  | SILIBININ        | -64.614                             |                                   |
| 6  | GEFITINIB        | -62.580                             |                                   |
| 7  | MUPIROCIN        | -61.684                             |                                   |
| 8  | CANAGLIFLOZIN    | -61.433                             |                                   |
| 9  | CLOFAZIMINE      | -60.275                             |                                   |
| 10 | TROXERUTIN       | -59.985                             |                                   |
| 11 | DECOQUINATE      | -59.790                             |                                   |
| 12 | BENZOYL PEROXIDE | -59.479                             | Not selected. Topical use         |
| 13 | RETINOL          | -59.198                             | Not selected. Topical use         |
| 14 | NOCODAZOLE       | -58.939                             |                                   |
| 15 | PIMOBENDAN       | -58.795                             | Not selected. Veterinary drug     |
| 16 | MEBENDAZOLE      | -58.391                             |                                   |
| 17 | METERGOLINE      | -56.191                             |                                   |
| 18 | CARVEDILOL       | -55.942                             |                                   |
| 19 | QUINOXYFEN       | -55.941                             | Not selected. Veterinary use      |
| 20 | FLUBENDAZOLE     | -55.940                             |                                   |
| 21 | PIMOZIDE         | -55.820                             |                                   |
| 23 | BERGENIN         | -55.319                             |                                   |
| 24 | DIACERIN         | -55.220                             |                                   |
| 25 | PRULIFLOXACIN    | -55.025                             |                                   |
| 26 | TELMISARTAN      | -54.778                             |                                   |
| 27 | PERPHENAZINE     | -54.182                             |                                   |
| 28 | IMATINIB         | -54.161                             |                                   |
| 29 | TEPOXALIN        | -53.937                             | Not selected. Veterinary drug     |
| 30 | RIBOFLAVIN       | -53.770                             |                                   |
| 31 | AVOBENZONE       | -53.170                             | Not selected. Cosmetic sun screen |
| 32 | FENOFIBRATE      | -52.902                             |                                   |
| 33 | OXFENDAZOLE      | -52.871                             |                                   |
| 34 | DOXORUBICIN      | -52.846                             |                                   |
| 35 | DERACOXIB        | -52.797                             |                                   |
| 36 | IPRIFLAVONE      | -52.475                             |                                   |
| 37 | BROMOPRIDE       | -52.077                             |                                   |
| 38 | KETOCONAZOLE     | -52.064                             |                                   |
| 39 | ROTENONE         | -51.995                             | Not selected. Insecticide         |
| 40 | NADIDE           | -51.806                             |                                   |
| 41 | GENISTEIN        | -51.706                             |                                   |
| 42 | ELLAGIC ACID     | -51.448                             |                                   |
| 43 | OCTINOXATE       | -51.349                             | Not selected. Cosmetic sun screen |
| 44 | TIGECYCLINE      | -51.315                             |                                   |
| 45 | CEFOPERAZONE     | -51.247                             |                                   |

|                                         |                          |         |                           |
|-----------------------------------------|--------------------------|---------|---------------------------|
| 46                                      | MYCOPHENOLATE<br>MOFETIL | -51.186 |                           |
| 47                                      | CELECOXIB                | -50.638 |                           |
| 48                                      | AVANAFIL                 | -50.542 |                           |
| 49                                      | TIOCONAZOLE              | -50.495 | Not selected. Topical use |
| 50                                      | PODOFILOX                | -50.456 | Not selected. Topical use |
| 51                                      | NAFTOPIDIL               | -50.410 |                           |
| 52                                      | CAPSAICIN                | -50.266 | Not selected. Topical use |
| <b>Reference compounds (catalytic)</b>  |                          |         |                           |
|                                         | indirubinE804            | -67.322 |                           |
|                                         | Wee1/ChK1                | -54.502 |                           |
|                                         | Gefitinib                | -58.537 |                           |
|                                         | Bosutinib                | -59.341 |                           |
|                                         | Wee1/Chk1                | -38.445 |                           |
| <b>Reference compounds (allosteric)</b> |                          |         |                           |
|                                         | indirubinE804            | -56.831 |                           |
|                                         | Bosutinib                | -46.079 |                           |
|                                         | Gefitinib                | -59.014 |                           |
|                                         | GAKSknapp                | -38.112 |                           |

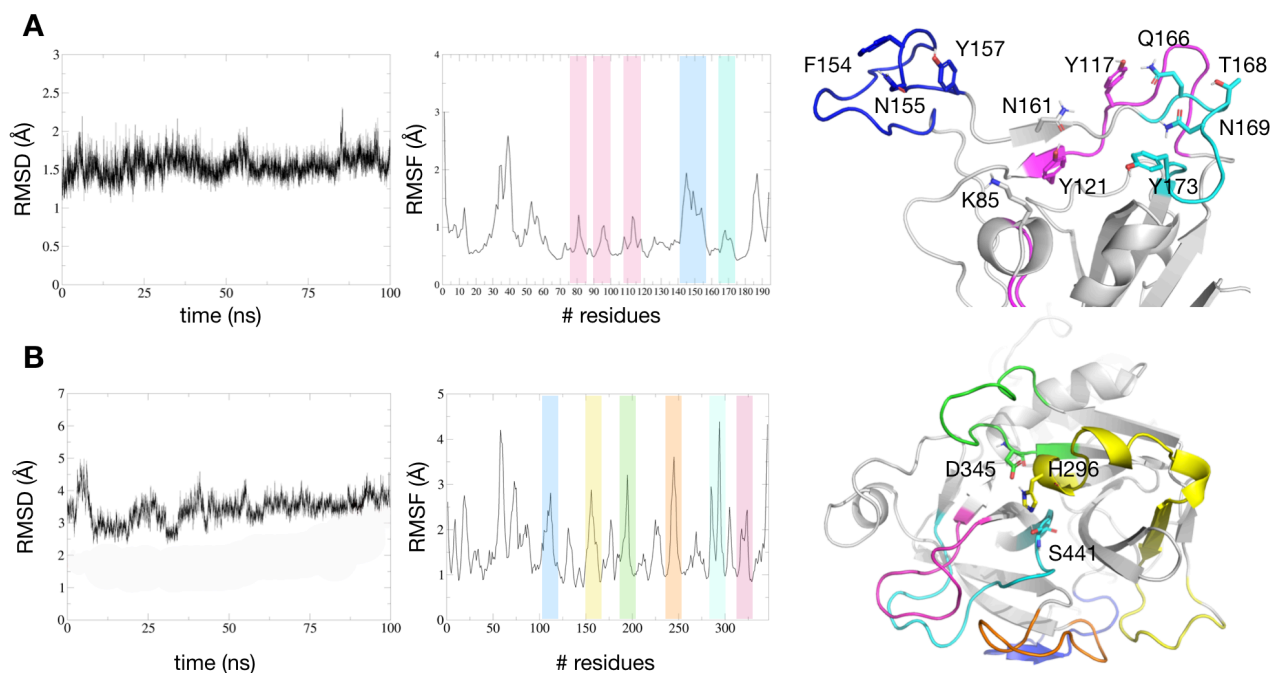

**Figure S1.** RMSD and RMSF analyses for the protein backbone atoms of **(A)** S1-RBD and **(B)** TMPRSS2. The energy minimized structure of the proteins has been used as reference for MD trajectory alignment, prior to RMSD and RMSF analyses. For both proteins, residues mainly involved in protein-ligand interactions are reported in sticks. Colored bands in the RMSF plots identify relevant regions pertaining to the binding sites.

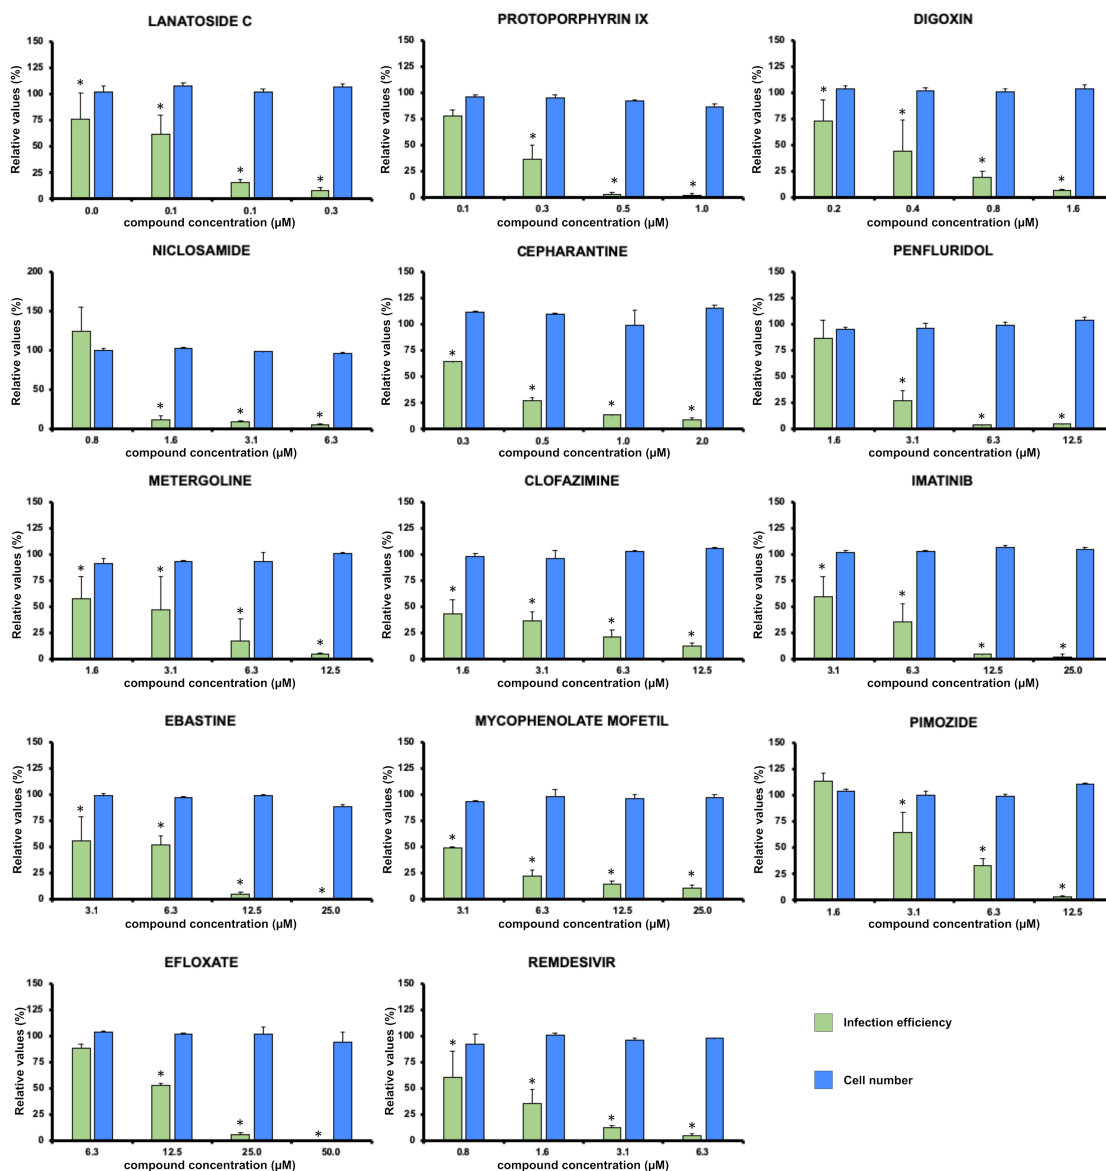

**Figure S2. Evaluation of the antiviral candidates using immunofluorescence microscopy-based viral antigen detection.** Vero-E6 cells were inoculated at MOI 0.01 in the presence of increasing compound concentrations. Relative infection efficiency was determined 24 hours post-infection by automated segmentation and signal quantitation using mock-infected cells and vehicle-treated cells as controls. Data are shown as average and standard deviation of three biological replicates. Statistical significance was determined using one-way ANOVA and Dunnet's post-hoc test.

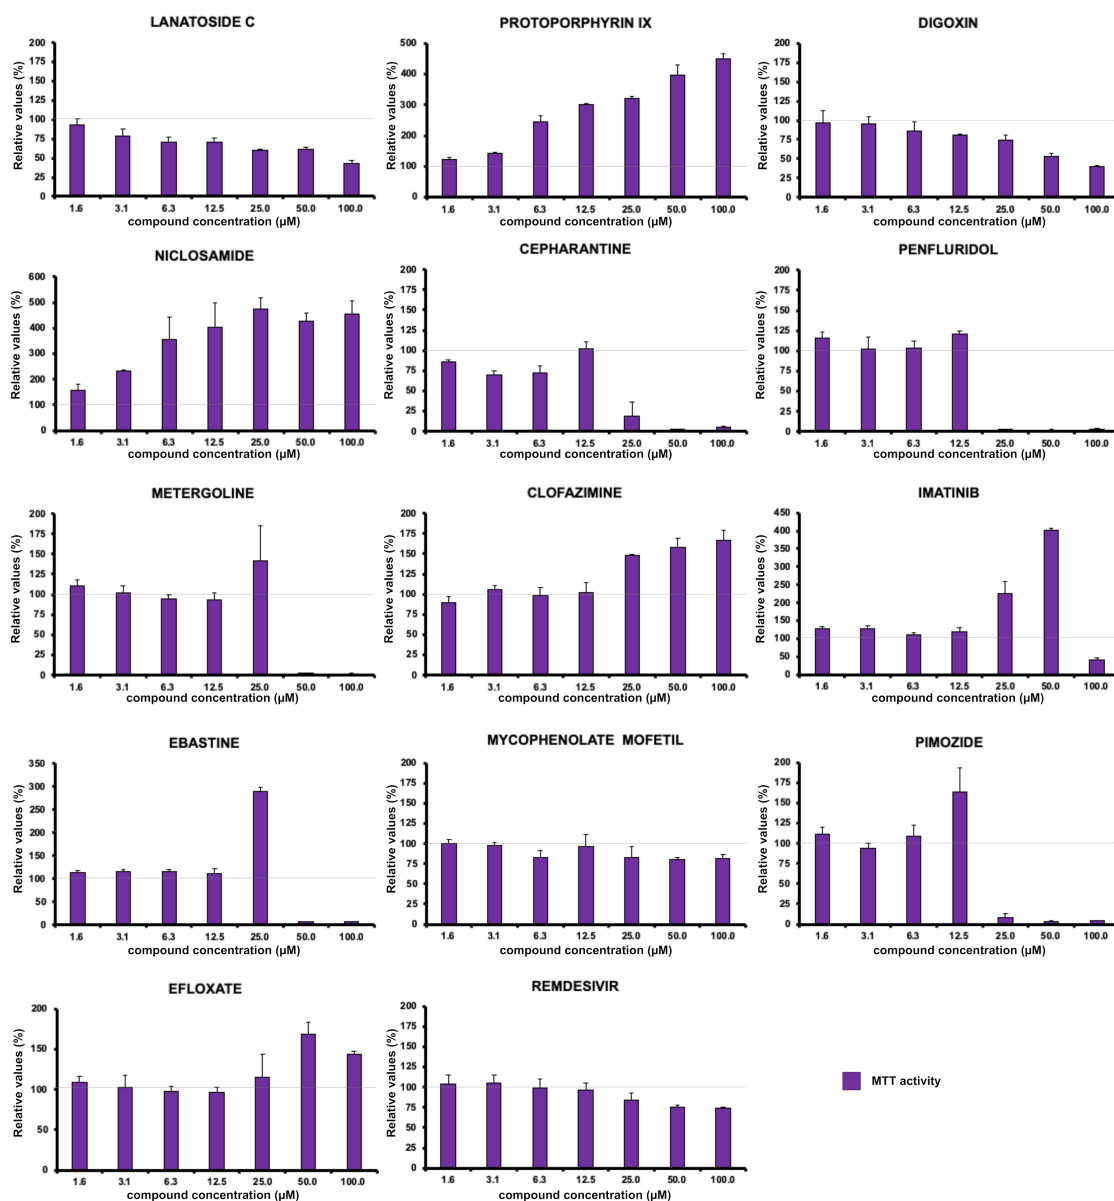

**Figure S3. Evaluation of compound cytotoxicity.** Vero-E6 cells were cultured in the presence of increasing compound concentrations. MTT activity was determined 48 hours post-treatment. Data are shown as average and standard deviation of three biological replicates.
